# Supplementary material for: A tellurium short-wave infrared photodetector with fast response and high specific detectivity
Source: Royal Society of Chemistry journal article supplement (doi:10.1039/d2nr02822k), 2022-01-01
Supplement: d2nr02822k1.pdf [file d2nr02822k1.pdf]

Supporting Information for

**Tellurene short-wave infrared photodetector with fast response and High specific detectivity**

*Yafei Yan<sup>a,†</sup>, Kai Xia<sup>b,c,†</sup>, Wei Gan<sup>a</sup>, Kemeng Yang<sup>a</sup>, Gang Li<sup>a</sup>, Xi Tang<sup>a</sup>, Liang Li<sup>a,c</sup>, Changjin Zhang<sup>a,d</sup>, Guang Tao Fei<sup>c,\*</sup>, Hui Li<sup>a,\*</sup>*

<sup>a</sup>Institute of Physical Science and Information Technology and Information Materials and Intelligent Sensing Laboratory of Anhui Province, Anhui University, Hefei 230601, China

<sup>b</sup>University of Science and Technology of China, Hefei 230026, P. R. China

<sup>c</sup>Key Laboratory of Materials Physics and Anhui Key Laboratory of Nanomaterials and Nanotechnology, Institute of Solid State Physics, Hefei Institutes of Physical Science, Chinese Academy of Sciences, Hefei 230031, P. R. China

<sup>d</sup>High Magnetic Field Laboratory of Anhui Province, Chinese Academy of Sciences, Hefei 230031, China

<sup>†</sup> These authors contributed equally.

\*Correspondence and requests for materials should be addressed to G. F. (email: [gtfei@issp.ac.cn](mailto:gtfei@issp.ac.cn)) and H. L. (email: [huili@ahu.edu.cn](mailto:huili@ahu.edu.cn)).

## **Experimental section**

### ***1. Synthesis and Characterization of 2D Te Nanoflakes***

0.1 g of Na<sub>2</sub>TeO<sub>3</sub> and 0.072 g of polyvinylpyrrolidone (PVP) (molecular weight 40000) were completely dissolved in 30 mL of deionized water. The aqueous solution was transferred into a Teflon-lined stainless-steel autoclave, followed by adding 3 mL ammonia solution (25% by wt/wt%) and 200  $\mu$ L - 1 mL hydrazine hydrate (80% by wt/wt%). Then the autoclave is sealed and kept at 180 °C for 20 - 48 hours before cooling to room temperature naturally. The obtained solid silver-gray product was centrifuged and precipitated at 5000 rpm/min for 5 minutes and washed three times using deionized water.

Characterization of Te nanoflakes: Te flakes were characterized using optical microscope (Olympus BX53M) for morphology observations, and AFM (Park NX10) for thickness determination. Stoichiometry analyses of as-grown Te nanoflakes were determined by energy dispersive X-ray spectroscopy (EDS) analysis through a field-emission scanning electron microscope (JEOL-7100F). The HRTEM images, SAED and EDX were characterized by TEM (JEM-F200).

### ***2. Angle Resolved Raman Spectra Measurement***

Angle resolved Raman spectra were measured at room temperature using Raman system (FST2 Ahdx DZ, Zolix) equipped with a monochromator, with laser wavelength of 532 nm and 100x microscope objective lens. Linear polarizer is placed under the spectrometer to polarize the reflected light in the same direction as the incident light. Angle-resolved Raman peak intensity was measured by rotating the Te nanoflake. The peak intensities of different Raman modes were extracted by using Lorentz fitting and plotted in polar plots.

### ***3. Device Fabrication and Characterization of Te-based Photodetectors***

The as-synthesized Te nanoflakes were firstly dispersed into deionized water and dropped onto the SiO<sub>2</sub>/Si substrates. Standard electron beam lithography (EBL) and thermal evaporation were adopted for the Cr/Au (10/100 nm) electrodes.

The current - voltage (*I-V*) characteristics and photocurrent response of Te

photodetectors were measured by Keithley semiconductor parameter analyzer (4200-SCS, Keithley Instruments Inc., Cleveland, OH, USA). The chopper is used to control the switch of the light path to produce low-frequency pulse light (GCI-73, Daheng Science & Technology Inc., Beijing, China). The LED light (MDL-III-1550-300mW, CNI., Changchun, China) with a central wavelength of 1550 nm was used as the light source for infrared light illumination.

**Supporting Note 1. Schematic illustration of hydrothermal synthesis process**

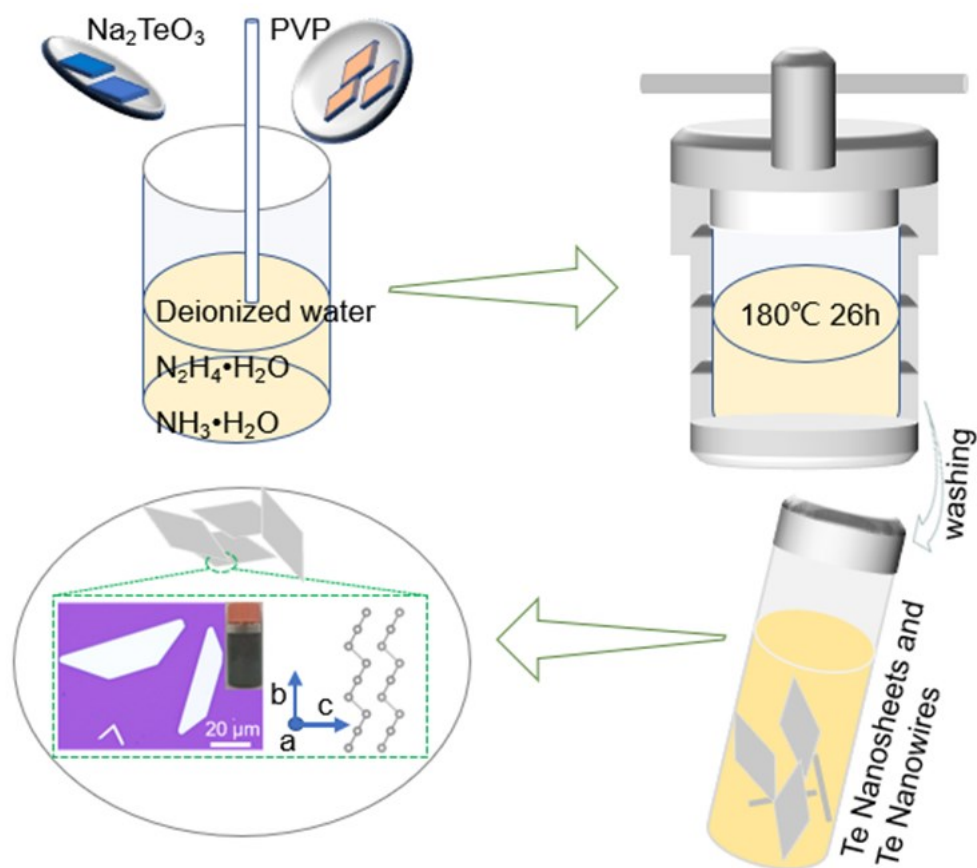

**Fig. S1** Schematic illustration for the hydrothermal synthesis of 2D Te nanoflakes.

**Supporting Note 2. Schematic illustration of Raman vibrations**

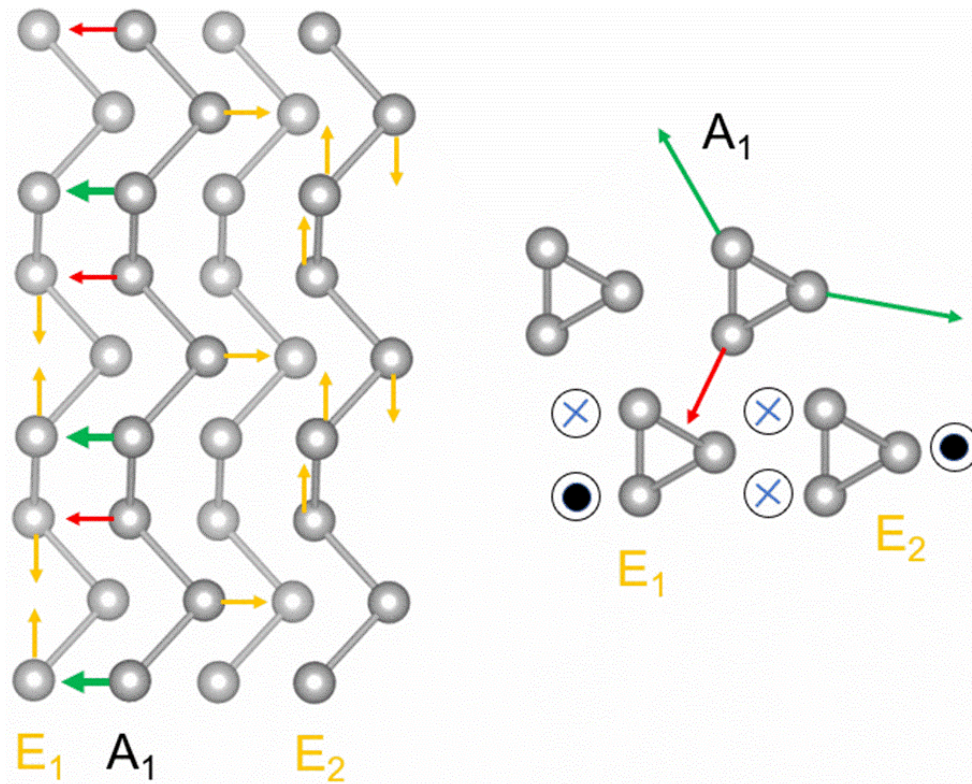

**Fig. S2** Schematic shows the three Raman-active modes in helical-chain van der Waals material Te.

### Supporting Note 3. Polarized Raman analysis

Theoretically, Te crystallizes with space group  $D_3^4$  (or  $D_3^6$ ) having three atoms per unit cell arranged helically along  $c$ -axis.<sup>Rs1</sup> The polarization Raman intensity of  $E_1$ -TO,  $A_1$  and  $E_2$  Raman modes can be expressed as.<sup>Rs2</sup>:

$$I_{E_1\text{-TO},\perp} = |A \sin^2(\theta)|^2 + B \quad (1)$$

$$I_{A_1,\parallel} = |C \sin^2\theta + D \cos^2\theta|^2 + E \quad (2)$$

$$I_{E_2,\parallel} = |2F \sin(\theta + G) \cos(\theta + G)|^2 + H \quad (3)$$

where  $A$ ,  $B$ ,  $C$ ,  $D$ ,  $E$ ,  $F$ ,  $G$ ,  $H$  are the Raman tensor elements and  $\theta$  is the angle between the long-axis of Te nanoflakes and the incident light polarization direction.

#### Supporting Note 4. Te nanoflakes field effect transistor characteristic

Electrical performance of Te-based field-effect transistor (FET) was measured by a Keithley 4200A semiconductor characterization system. Back-gated FETs were fabricated on a heavily doped Si substrate with a 300 nm SiO<sub>2</sub> layer. and (see Materials and Method for details). The output characteristics ( $I_{ds}$ - $V_{ds}$ ) are shown in Fig. S3a nonlinear increased as the gate voltage decreasing from 0 to -50 V, indicating an ohmic contact between Cr/Au (10/100 nm) and Te channel. In addition, the transfer curve ( $I_{ds}$ - $V_{gs}$ ) shows the  $p$ -type behavior of Te channel in Figure S3b. The mobility of Te nanosheet is further estimated from the transfer curve measured at  $V_{ds} = 1$  V using equation expressed by:

$$\mu = \frac{L}{WC_i V_{ds}} \frac{\partial I_{ds}}{\partial V_g}$$

where  $L$  and  $W$  are the channel length and width, respectively, and  $C_i$  is the capacitance per unit area to the gate electrode ( $C_i = \epsilon_{SiO_2}/d_{SiO_2} = 1.23 \times 10^{-4}$  F m<sup>-2</sup> with  $\epsilon_{SiO_2}$  and  $d_{SiO_2}$  is the dielectric constant and thickness of the SiO<sub>2</sub> substrate). As shown in Fig. S3(b), the hole mobility at room temperature is calculated to be 48.63 cm<sup>2</sup>/(Vs). The smaller mobility may be influenced by the presence of carriers near the semiconductor-oxide interface.

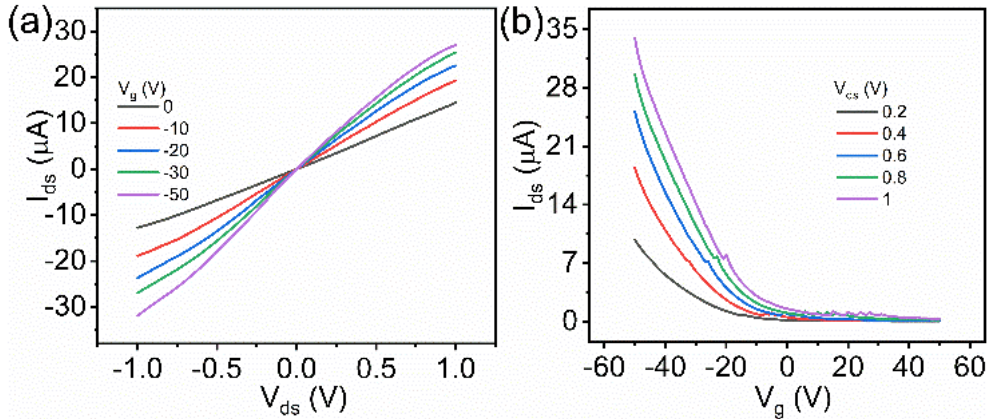

**Fig. S3** (a) Output curves of Te flakes measured at different gate voltages. (b) Transfer curves of Te flakes measured under different source-drain voltages.

## Supporting Note 5. Te nanoflakes short-wave infrared photodetector performance

Figure S4a shows the  $I$ - $V$  curves of Te-based device under dark and different incident laser power density. Figure S4b and S4c shows the corresponding photo-switching behavior, which exhibits fast response ( $\tau_{\text{rise}} \sim 33 \mu\text{s}$  and  $\tau_{\text{decay}} \sim 30 \mu\text{s}$ ) under different laser frequencies. As shown in Figure S4d, the stability of Te-based phototransistor is examined by switching the laser on and off for over 10 minutes, during which the photo-switching behavior exhibits no obvious degradation.

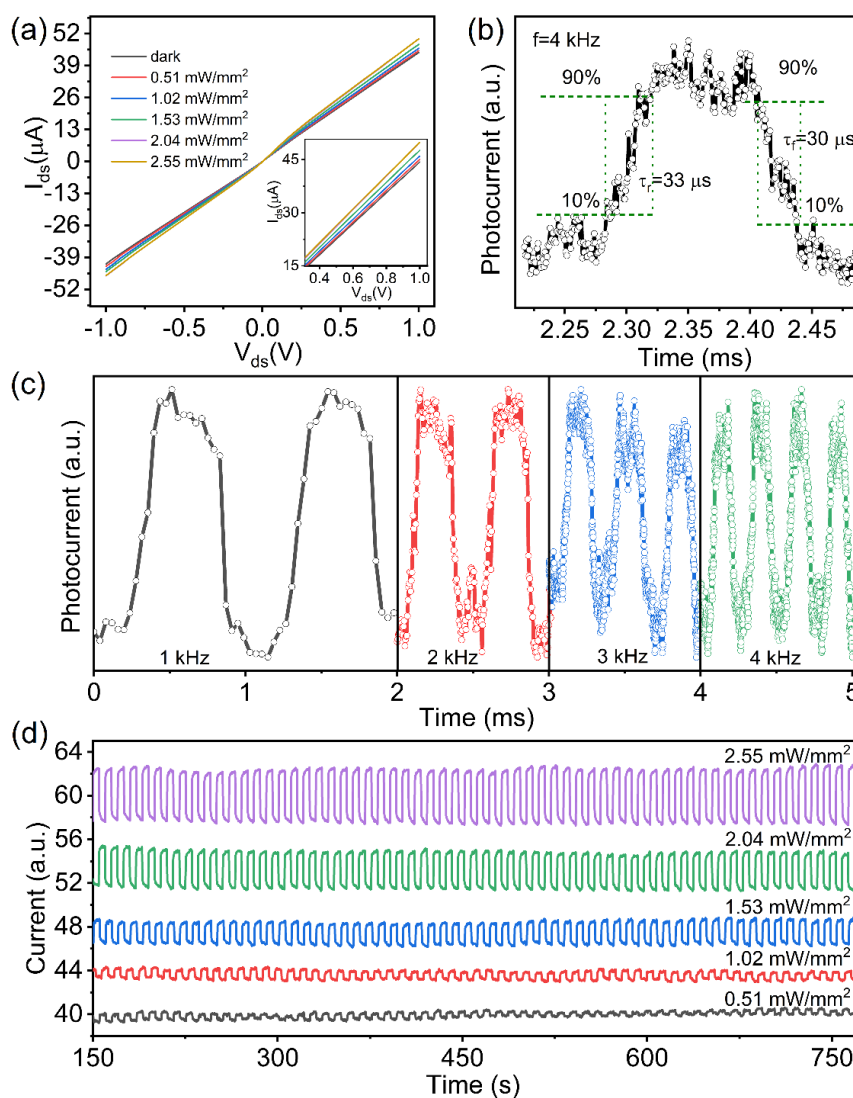

**Fig. S4** (a)  $I$ - $V$  curves of Te-based phototransistors under different laser power densities. (b)  $I$ - $t$  curves as light turned on and off at different frequencies, with bias voltage of 1 V and incident light power of 2.04  $\text{mW}/\text{mm}^2$ . (c) Response time of Te-based phototransistors. (d) Photo-switching behavior of Te-based phototransistors under different laser power densities. Excitation laser wavelength of 1550 nm.



**Table S1** Performance Parameters Comparison of Photodetectors based on Te and other two-dimensional materials Photodetectors Reported in the Literature.

| Materials                                      | Detectivity<br>(Jones) | Responsivity<br>(A W <sup>-1</sup> ) | Rising time<br>(ms) | Decay time<br>(ms) | Refs      |
|------------------------------------------------|------------------------|--------------------------------------|---------------------|--------------------|-----------|
| Te nanosheet                                   | 1.886×10 <sup>10</sup> | 51.9                                 | 0.019               | 0.021              | This work |
| Te flake                                       | 2×10 <sup>9</sup>      | 16                                   | --                  | --                 | Rs3       |
| Te nanosheet                                   | 10 <sup>7</sup>        | 1.34×10 <sup>-5</sup>                | 570                 | 6400               | Rs4       |
| Te hexagonal flake                             | --                     | 389.5                                | 4400                | 2800               | Rs5       |
| Te nanosheet                                   | --                     | 9.38                                 | 0.07                | 0.072              | Rs6       |
| Te nanowire                                    | 1.23×10 <sup>12</sup>  | 6500                                 | 0.0317              | 0.0255             | Rs7       |
| PtSSe                                          | --                     | --                                   | 0.0699              | 0.0319             | Rs8       |
| MoS <sub>2</sub>                               | --                     | 880                                  | 600                 | 9000               | Rs9       |
| WS <sub>2</sub>                                | --                     | 2.1X10 <sup>-5</sup>                 | 5.3                 | 5.3                | Rs10      |
| GaS                                            | 10 <sup>10</sup>       | 4.2                                  | 30                  | --                 | Rs11      |
| InSe                                           | 10 <sup>11</sup>       | 1.2                                  | 50                  | 4000               | Rs12      |
| SnS <sub>2</sub>                               | --                     | --                                   | 42                  | 42                 | Rs13      |
| Ga <sub>2</sub> In <sub>4</sub> S <sub>9</sub> | 2.25x10 <sup>11</sup>  | 111.9                                | 40                  | 50                 | Rs14      |
| PtSe/GaAs                                      | 2.52x10 <sup>12</sup>  | 0.262                                | 0.006               | 0.007              | Rs15      |
| Graphene/Si                                    | 1.4X10 <sup>8</sup>    | 0.435x10 <sup>-3</sup>               | 1.3                 | 3                  | Rs16      |
| PdSe/Si                                        | 1.18x10 <sup>13</sup>  | 0.3                                  | 0.038               | 0.044              | Rs17      |

## REFERENCES

- (Rs1) A. S. Pine, G. Dresselhaus, *Phys. Rev. B.* 1971, **4**, 356-371.
- (Rs2) L. Tong, X. Huang, P. Wang, L. Ye, M. Peng, L. An, Q. Sun, Y. Zhang, G. Yang, Z. Li, F. Zhong, F. Wang, Y. Wang, M. Motlag, W. Wu, G. J. Cheng and W. Hu, *Nat. Commun.*, 2020, **11**, 2308.
- (Rs3) M. Amani, C. Tan, G. Zhang, C. Zhao, J. Bullock, X. Song, H. Kim, V.R. Shrestha, Y. Gao, K.B. Crozier, M. Scott and A. Javey, *ACS Nano.*, 2018, **12**, 7253-7263.
- (Rs4) J. Peng, Y. Pan, Z. Yu, Jia. jing. Wu, Jun. chi. Wu, Yuan. Zhou, Yu. qiao. Guo, Xiao. jun. Wu, Chang. zheng. Wu, and Yi. Xie, *Angew. Chem. Int. Ed.*, 2018, **57**, 13533-13537.
- (Rs5) Q. Wang, M. Safdar, K. Xu, M. Mirza, Z. Wang and J. He, *ACS Nano.*, 2014, **8**, 7497-7505.
- (Rs6) W. Ma, Y. Gao, L. Shang, W. Zhou, N. Yao, L. Jiang, Q. Qiu, J. Li, Y. Shi, Z. Hu and Z. Huang, *Adv. Sci.*, 2022, **9**, 2103873.
- (Rs7) M. Peng, R. Z. Xie, Z. Wang, P. Wang, F. Wang, H. N. Ge, Y. Wang, F. Zhong, P. S. Wu, J. F. Ye, Q. Li, L. L. Zhang, X. Ge, Y. Ye, Y. C. Lei, W. Jiang, Z. G. Hu, F. Wu, X. H. Zhou, J. S. Miao, J. L. Wang, H. G. Yan, C. X. Shan, J. N. Dai, C. Q. Chen, X. S. Chen, W. Lu, W. D. Hul, *Sci. Adv.*, 2021, **7**, eabf7358.
- (Rs8) Z. Wang, H. Xia, P. Wang, X. H. Zhou, C. S. Liu, Q. H. Zhang, F. Wang, M. L. Huang, S. Y. Chen, P. S. Wu, Y. F. Chen, J. F. Ye, S. Y. Huang, H. G. Yan, L. Gu, J. S. Miao, T. X. Li, X. S. Chen, W. Lu, P. Zhou, and W. D. Hu, *Adv. Mater.*, 2021, **33**, 2104942.
- (Rs9) O. Lopez-Sanchez, D. Lembke, M. Kayci, A. Radenovic, A. Kis, *Nat. Nanotechnol.*, 2013, **8**, 497.
- (Rs10) N. Perea-López, A. L. Elías, A. Berkdemir, A. Castro-Beltran, H. R. Gutiérrez, S. Feng, R. Lv, T. Hayashi, F. López-Urías, S. Ghosh, B. Muchharla, S. Talapatra, H. Terrones, M. Terrones, *Adv. Funct. Mater.*, 2013, **23**, 5511.
- (Rs11) P. Hu, L. Wang, M. Yoon, J. Zhang, W. Feng, X. Wang, Z. Wen, J. C. Idrobo, Y. Miyamoto, D. B. Geohegan, K. Xiao, *Nano Lett.*, 2013, **13**, 1649.
- (Rs12) S. R. Tamalampudi, Y. Y. Lu, U. R. Kumar, R. Sankar, C. D. Liao, B. K. Moorthy,

- C. H. Cheng, F. C. Chou, Y. T. Chen, *Nano Lett.*, 2014, **14**, 2800.
- (Rs13) J. Xia, D. Zhu, L. Wang, B. Huang, X. Huang, X. M. Meng, *Adv. Funct. Mater.*, 2015, **25**, 4255.
- (Rs14) F. k. Wang, T. Gao, Q. Zhang, Z. Y. Hu, B. Jin, L. Li, X. Zhou, H. Q. Li, Gustaaf Van. Tendeloo, and T. Y. Zhai. *Adv. Mater.*, **2018**, 1806306.
- (Rs15) X. An, F. Liu, Y. J. Jung and S. Kar, *Nano Lett.*, 2013, **13**, 909-916.
- (Rs16) C. Jia, D. Wu, E. Wu, J. Guo, Z. Zhao, Z. Shi, T. Xu, X. Huang, Y. Tian and X. Li, *J. Mater. Chem. C.*, 2019, **7**, 3817-3821.
- (Rs17) L. Zeng, D. Wu, S. Lin, C. Xie, H. Yuan, W. Lu, S. P. Lau, Y. Chai, L. Luo, Z. Li and Y. H. Tsang, *Adv. Funct. Mater.*, 2019, **29**, 1806878.
